# Supplementary material for: Uncovering a Nuisance Influence of a Phenological Trait of Plants Using a Nonlinear Structural Equation: Application to Days to Heading and Culm Length in Asian Cultivated Rice (Oryza Sativa L.)
Source: PLoS One. 2016 Feb 9;11(2):e0148609. doi: 10.1371/journal.pone.0148609 (PMC4747597; doi:10.1371/journal.pone.0148609)
Supplement: S1 Table — (XLSX) [file pone.0148609.s001.xlsx]

## Sheet: S1 Table
S1 Table The cultivars and major gene polymorphisms																							Region names (in color) and field locations (in italic)
No.	Cultivar	Improved/Landrace	Region	Registration year	Major gene polymorphisms
					SD1				HD6		HD16		HD17		HD1 haplotype					Ghd7
					Jikkoku	Reimei	IR8		SNP		SNP		SNP		2	3	4	5		SNP	Indel
1	Kirara 397	Improved	Hokkaido	1990	0	0	0		0		1		1		1	0	0	0		1	0
2	Hoshinoyume	Improved	Hokkaido	2000	0	0	0		0		1		1		1	0	0	0		1	0
3	Yukihikari	Improved	Hokkaido	1986	0	0	0		1		1		1		0	0	0	1		1	0
4	Hayamasari	Improved	Hokkaido	1990	0	0	0		0		1		1		1	0	0	0		1	0
5	Hatsushizuku	Improved	Hokkaido	1998	0	0	0		0		1		1		1	0	0	0		1	0
6	Yukara	Improved	Hokkaido	1962	0	0	0		0		1		1		0	0	0	1		0	1
7	Tsugaruroman	Improved	Tohoku	2000	0	0	0		0		1		0		0	1	0	0		0	0
8	Yumeakari	Improved	Tohoku	2002	0	0	0		0		1		0		0	1	0	0		0	0
9	Mutsuhomare	Improved	Tohoku	1986	0	1	0		0		1		1		0	1	0	0		0	0
10	Fukei 175	Improved	Tohoku	1993	0	0	0		0		1		0		0	1	0	0		0	0
11	Akihikari	Improved	Tohoku	1976	0	1	0		1		1		1		0	1	0	0		0	0
12	Reimei	Improved	Tohoku	1966	0	1	0		1		1		1		0	1	0	0		0	0
13	Fujisaka 5	Improved	Tohoku	1947	0	0	0		1		1		1		0	1	0	0		0	0
14	Toyonishiki	Improved	Tohoku	1969	0	0	0		0		1		0		0	1	0	0		0	0
15	Ouu 197	Improved	Tohoku	1937	0	0	0		1		1		1		0	1	0	0		0	0
16	Chiyohonami	Improved	Tohoku	1987	0	0	0		0		1		0		0	1	0	0		0	0
17	Hitomebore	Improved	Tohoku	1992	0	0	0		0		1		0		0	1	0	0		0	0
18	Manamusume	Improved	Tohoku	2001	0	0	0		0		1		0		0	1	0	0		0	0
19	Akitakomachi	Improved	Tohoku	1984	0	0	0		0		1		0		0	1	0	0		0	0
20	Okiniiri	Improved	Tohoku	1996	0	0	0		0		1		0		0	1	0	0		0	0
21	Fukuhibiki	Improved	Tohoku	1995	0	0	0		0		1		1		0	1	0	0		0	0
22	Himenomochi	Improved	Tohoku	1972	0	0	0		0		0		0		0	1	0	0		0	0
23	Kinuhikari	Improved	Hokuriku	1989	0	0	1		0		0		0		0	0	0	0		0	0
24	Dontokoi	Improved	Hokuriku	1997	0	0	1		0		0		0		0	0	0	0		0	0
25	Itadaki	Improved	Hokuriku	2003	0	0	1		0		0		0		0	0	0	0		0	0
26	Norin 1	Improved	Hokuriku	1931	0	0	0		0		0		0		0	1	0	0		0	0
27	Hounen-wase	Improved	Hokuriku	1955	0	0	0		0		0		0		0	1	0	0		0	0
28	Todoroki-wase	Improved	Hokuriku	1968	0	0	0		0		0		0		0	1	0	0		0	0
29	Koshihikari	Improved	Hokuriku	1956	0	0	0		0		0		0		0	0	0	0		0	0
30	Hanaechizen	Improved	Hokuriku	1993	0	0	0		0		0		0		0	0	1	0		0	0
31	Yukinosei	Improved	Hokuriku	1990	0	0	0		0		1		0		0	1	0	0		0	0
32	Gohyakumangoku	Improved	Hokuriku	1957	0	0	0		1		1		1		0	1	0	0		0	0
33	Koganemochi	Improved	Hokuriku	1956	0	0	0		0		0		0		1	0	0	0		0	0
34	Koshiji-wase	Improved	Hokuriku	1953	0	0	0		0		1		0		0	1	0	0		0	0
35	Goropikari	Improved	Kanto-Tokai	1994	0	0	0		0		1		1		0	0	0	0		0	0
36	Fusaotome	Improved	Kanto-Tokai	1999	0	0	0		0		0		0		0	1	0	0		0	0
37	Hatsushimo	Improved	Kanto-Tokai	1950	0	0	0		0		1		0		1	0	0	0		0	0
38	Aichinokaori	Improved	Kanto-Tokai	1988	0	0	0		0		1		0		1	0	0	0		0	0
39	Matsuribare	Improved	Kanto-Tokai	1995	0	0	0		0		1		1		0	0	0	0		0	0
40	Asanohikari	Improved	Kanto-Tokai	1988	0	0	0		0		1		1		0	0	0	0		0	0
41	Tsukinohikari	Improved	Kanto-Tokai	1986	0	0	0		0		1		1		0	0	0	0		0	0
42	Daichinokaze	Improved	Kanto-Tokai	2002	0	0	0		0		1		0		1	0	0	0		0	0
43	Mineasahi	Improved	Kanto-Tokai	1981	0	0	0		0		1		0		0	1	0	0		0	0
44	Norin 29	Improved	Kanto-Tokai	1945	0	0	0		1		1		1		0	0	0	0		0	0
45	Akebono	Improved	Kanto-Tokai	1953	0	0	0		1		1		1		1	0	0	0		0	0
46	Millenishiki	Improved	Kanto-Tokai	2003	0	0	0		0		1		1		0	0	0	0		0	0
47	Satojiman	Improved	Kanto-Tokai	2005	0	1	0		0		0		0		0	0	0	0		0	0
48	Otomemochi	Improved	Tohoku	1966	0	0	0		0		0		0		0	1	0	0		0	0
49	Yamabiko	Improved	Kanto-Tokai	1958	0	0	0		0		1		1		1	0	0	0		0	0
50	Nakate-shinsenbon	Improved	Kanto-Tokai	1950	0	0	0		1		1		1		1	0	0	0		0	0
51	Kinmaze	Improved	Kanto-Tokai	1948	0	0	0		1		1		1		1	0	0	0		0	0
52	Yamadanishiki	Improved	Kinki-Chugoku	1936	0	0	0		1		1		1		1	0	0	0		0	0
53	Norin 22	Improved	Kinki-Chugoku	1943	0	0	0		0		1		0		0	0	0	0		0	0
54	Asahi2	Landrace	Unknown	Unknown	0	0	0		1		1		1		1	0	0	0		0	0
55	Reiho	Improved	Kyushu	1969	1	0	0		1		1		1		1	0	0	0		0	0
56	Hiyokumochi	Improved	Kyushu	1971	1	0	0		1		1		1		1	0	0	0		0	0
57	Houyoku	Improved	Kyushu	1961	1	0	0		1		1		1		1	0	0	0		0	0
58	Jukkoku	Landrace	Unknown	Unknown	1	0	0		1		1		1		1	0	0	0		0	0
59	Norin 18	Improved	Kyushu	1941	0	0	0		1		1		1		1	0	0	0		0	0
60	Hinohikari	Improved	Kyushu	1989	0	0	0		0		1		0		0	0	0	0		0	0
61	Nishihomare	Improved	Kyushu	1979	1	0	0		1		1		1		1	0	0	0		0	0
62	Koganemasari	Improved	Kyushu	1976	0	0	0		0		1		0		0	0	0	0		0	0
63	Yumetsukushi	Improved	Kyushu	1995	0	0	1		0		0		0		0	0	0	0		0	0
64	Aikoku	Landrace	Unknown	Unknown	0	0	0		1		1		0		1	0	0	0		0	1
65	Asahi1	Landrace	Unknown	Unknown	0	0	0		1		1		1		1	0	0	0		0	0
66	Ohba	Landrace	Unknown	Unknown	0	0	0		0		1		1		1	0	0	0		0	0
67	Kameji	Landrace	Unknown	Unknown	0	0	0		1		1		1		0	0	0	0		0	0
68	Kamenoo	Landrace	Unknown	Unknown	0	0	0		1		1		1		1	0	0	0		0	0
69	Shinriki	Landrace	Unknown	Unknown	0	0	0		1		1		1		1	0	0	0		0	0
70	Takenari	Landrace	Unknown	Unknown	0	0	0		1		1		1		1	0	0	0		0	0
71	Futaba	Improved	Kanto-Tokai	1940	0	0	0		1		1		1		1	0	0	0		0	0
72	Nipponbare	Improved	Kanto-Tokai	1963	0	0	0		0		1		1		0	0	0	0		0	0
73	Nihonmasari	Improved	Kanto-Tokai	1973	0	0	0		0		1		1		0	0	0	0		0	0
74	Kihou	Improved	Kanto-Tokai	1968	0	0	0		0		1		1		0	1	0	0		0	0
75	Koganebare	Improved	Kanto-Tokai	1981	0	0	0		0		1		1		0	0	0	0		0	0
76	Taichung 65	Improved	(Taiwan)	1927	0	0	0		1		1		0		1	0	0	0		0	0
77	Eiko	Improved	Hokkaido	1939	0	0	0		1		1		1		0	0	0	1		0	1
78	Akage	Landrace	Unknown	Unknown	0	0	0		1		1		0		0	0	0	1		1	0
79	Fujihikari	Improved	Kinki-Chugoku	1977	0	0	0		0		0		1		0	0	1	0		0	0
80	Benisengoku	Improved	Kyushu	1953	0	0	0		1		1		0		1	0	0	0		0	0
81	Yumehitachi	Improved	Kanto-Tokai	2000	0	0	1		0		0		0		0	0	0	0		0	0
82	Asahinoyume	Improved	Kanto-Tokai	2000	0	0	0		0		1		1		1	0	0	0		0	0
83	Akanezora	Improved	Kanto-Tokai	1993	0	0	0		0		0		0		0	0	0	0		0	0
84	Hatsuboshi	Improved	Kanto-Tokai	1977	0	0	0		0		1		1		0	1	0	0		0	0
85	Chiyonishiki	Improved	Kanto-Tokai	1986	0	0	0		0		1		0		0	1	0	0		0	0
86	Menkoina	Improved	Tohoku	2001	0	0	0		0		1		0		0	1	0	0		0	0
87	Notohikari	Improved	Hokuriku	1986	0	0	0		0		1		0		0	0	1	0		0	0
88	Hohohonoho	Improved	Hokuriku	1993	0	0	0		0		1		0		0	0	1	0		0	0
89	Yumehikari	Improved	Kyushu	1992	1	0	0		1		1		0		0	0	0	0		0	0
90	Natsuhikari	Improved	Kyushu	1984	0	0	0		0		1		0		0	0	1	0		0	0
91	Haenuki	Improved	Tohoku	1993	0	1	0		0		1		0		0	1	0	0		0	0
92	Domannaka	Improved	Tohoku	1993	0	0	0		0		0		0		0	1	0	0		0	0
93	Haruru	Improved	Kinki-Chugoku	2001	0	1	0		0		0		0		0	0	0	0		0	0
94	Norin 6	Improved	Kinki-Chugoku	1936	0	0	0		1		1		1		0	0	0	0		0	0
95	Norin 8	Improved	Kinki-Chugoku	1937	0	0	0		0		1		0		1	0	0	0		0	0
96	Morita-wase	Landrace	Unknown	1913	0	0	0		0		0		1		0	0	0	0		0	0
97	Rikuu 132	Improved	Tohoku	1921	0	0	0		1		1		0		0	1	0	0		0	0
98	Joshu	Landrace	Unknown	Unknown	0	0	0		1		1		1		0	0	0	0		0	0
99	Senichi	Landrace	Unknown	Unknown	0	0	0		1		1		0		1	0	0	0		0	1
100	Ginbozu	Landrace	Unknown	Unknown	0	0	0		0		1		1		0	0	0	0		0	0
101	Rikuu 20	Landrace	Tohoku	1915	0	0	0		1		1		0		1	0	0	0		0	1
102	Kamenoo 4	Landrace	Tohoku	1915	0	0	0		1		1		1		0	1	0	0		0	0
103	Omachi	Landrace	Unknown	Unknown	0	0	0		1		1		1		1	0	0	0		0	0
104	Sekitori	Landrace	Unknown	Unknown	0	0	0		1		1		1		0	0	0	0		0	0
105	Bozu	Landrace	Unknown	Unknown	0	0	0		1		1		0		0	0	0	1		1	0
106	Shirosenbon	Landrace	Unknown	Unknown	0	0	0		1		1		1		1	0	0	0		0	0
107	Hatsunishiki	Improved	Tohoku	1954	0	0	0		0		0		0		0	1	0	0		0	0
108	Yamasenishiki	Improved	Tohoku	1962	0	0	0		0		0		0		0	1	0	0		0	0
109	Sasashigure	Improved	Tohoku	1952	0	0	0		0		1		1		0	1	0	0		0	0
110	Sasanishiki	Improved	Tohoku	1963	0	0	0		0		1		0		0	1	0	0		0	0
